# Supplementary material
Source: Springer Nature journal article supplement (https://www.springermedizin.de/resource/supplementary/12936_2012_2700_MOESM3_ESM.docx/9545148)
Supplement: MOESM3 [file 9545148]

| **Table 2**: Community medicine distributer pre- and post-training questionnaire scores | | | |
| --- | --- | --- | --- |
|  | Pre-training score | Post-training score | P-value |
| Overall understanding and ability to carry out protocol | 14 (52%) | 20 (75%) | P<0.01 |
| Able to recognize clinical malaria symptoms | 10 (37%) | 12 (47%) | P=0.21 |
| Overall questionnaire | 14 (52%) | 19 (73%) | P=0.02 |
